# Supplementary material
Source: publisher site journal article supplement (https://www.spandidos-publications.com/6172/downloadSupplementary)

Figure S1. Single-sample gene set enrichment analyses. HIF1 $\alpha$ , hypoxia-inducible factor 1 subunit alpha; T<sub>H</sub>, T helper; T<sub>CM</sub>, central memory T cells;  $\gamma$  $\delta$ T, gamma delta T cells.

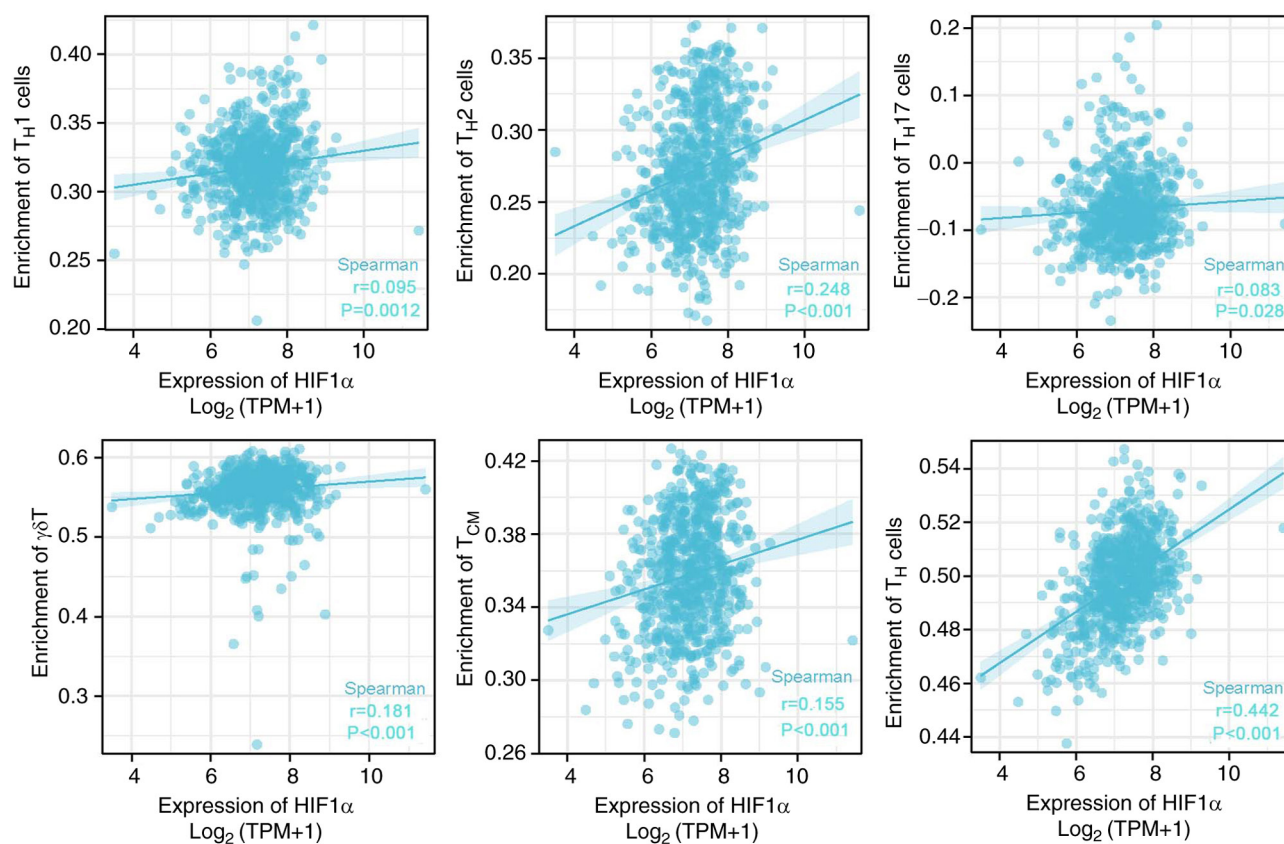

Figure S2. Single-sample gene set enrichment analyses. HIF1 $\alpha$ , hypoxia-inducible factor 1 subunit alpha; aDCs, activated dendritic cells; Treg, regulatory T cells.

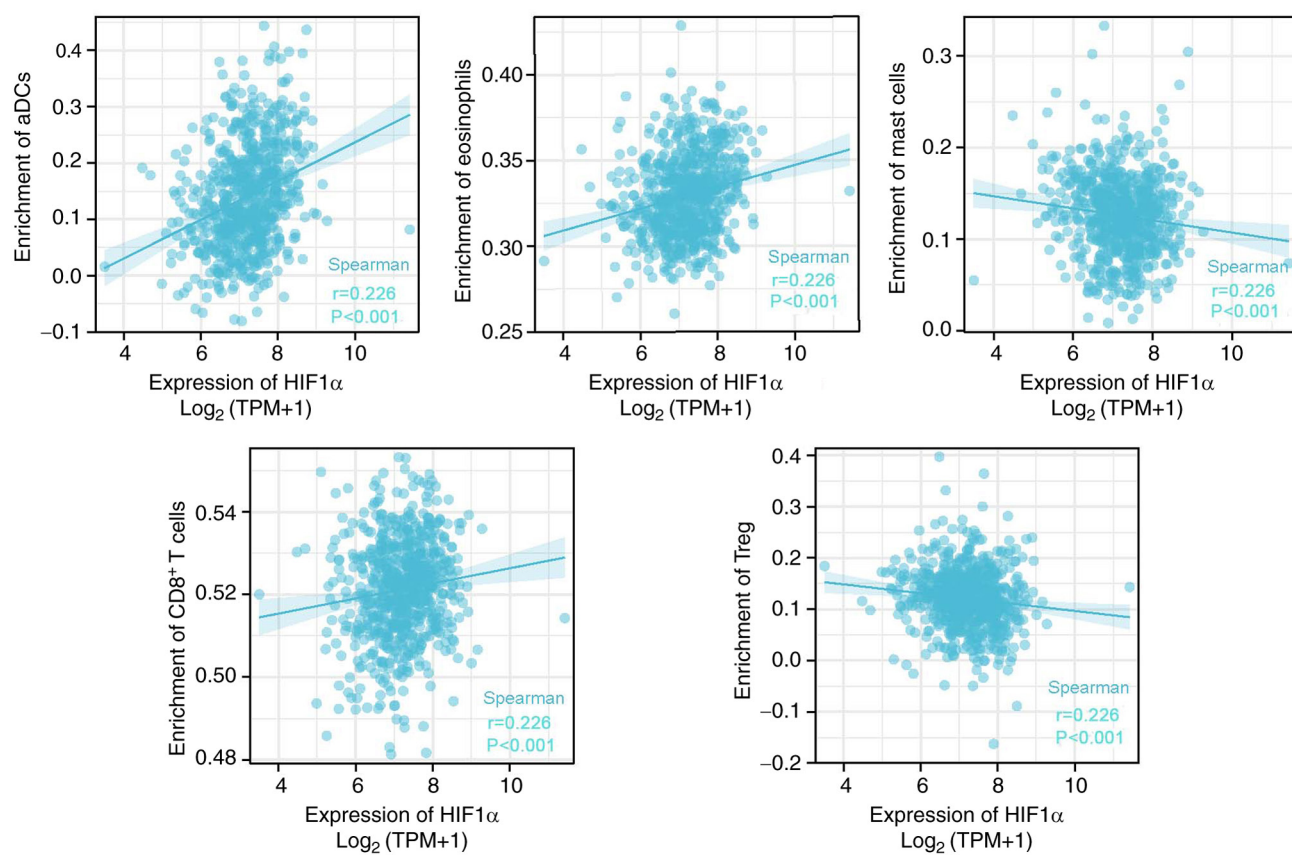

Supplement: Supplementary file 1 [file downloadSupplementary]
